# Supplementary material
Source: Springer Nature journal article supplement (https://www.springermedizin.de/resource/supplementary/12992_2010_81_MOESM7_ESM.pdf/9616464)

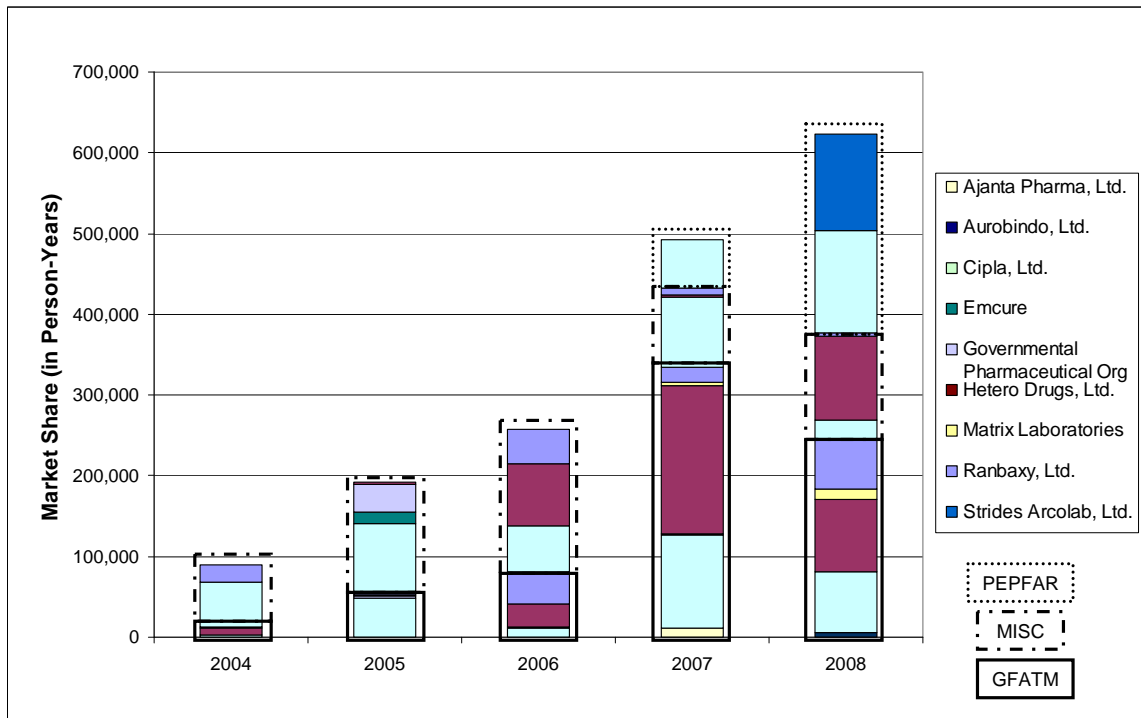

7a

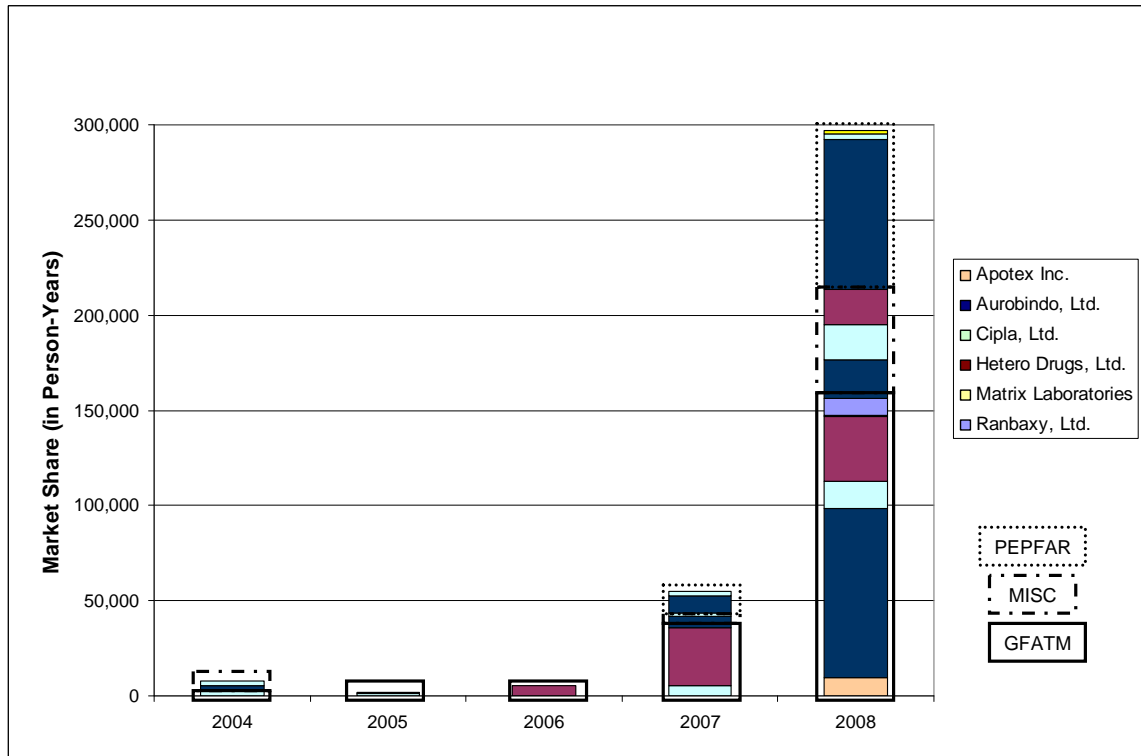

7b

Supplement: MOESM7 [file 9616464]
